# Supplementary material
Source: PubMed Central journal article supplement (PMC5728086)
Supplement: NIHMS920387-supplement-supplement_1.pdf [file NIHMS920387-supplement-supplement_1.pdf]

- Ishibashi, J., Perry, R.L., Asakura, A. and Rudnicki, M.A. (2005) MyoD induces myogenic differentiation through cooperation of its NH<sub>2</sub>- and COOH-terminal regions. *J Cell Biol* 171:471–482.
- Jones, D.T., Taylor, W.R. and Thornton, J.M. (1992) The rapid generation of mutation data matrices from protein sequences. *Comput Appl Biosci* 8:275–282.
- Jones, M.E. and Zhuang, Y. (2007) Acquisition of a functional T cell receptor during T lymphocyte development is enforced by HEB and E2A transcription factors. *Immunity* 27:860–870.
- Kageyama, R., Ohtsuka, T., Hatakeyama, J. and Ohsawa, R. (2005) Roles of bHLH genes in neural stem cell differentiation. *Exp Cell Res* 306:343–348.
- Ledent, V., Paquet, O. and Vervoort, M. (2002) Phylogenetic analysis of the human basic helix-loop-helix proteins. *Genome Biol* 3:RESEARCH0030.
- Lewis, P.O. (2001) Phylogenetic systematics turns over a new leaf. *Trends Ecol Evolut* 16:30–37.
- Li, X., Duan, X., Jiang, H., Sun, Y., Tang, Y., Yuan, Z., Guo, J., Liang, W., Chen, L., Yin, J., Ma, H., Wang, J. and Zhang, D. (2006) Genome-wide analysis of basic/helix-loop-helix transcription factor family in rice and Arabidopsis. *Plant Physiol* 141:1167–1184.
- McLean, D.J., Friel, P.J., Pouchnik, D. and Griswold, M.D. (2002) Oligonucleotide microarray analysis of gene expression in follicle-stimulating hormone-treated rat Sertoli cells. *Mol Endocrinol* 16:2780–2792.
- Morikawa, Y. and Cserjesi, P. (2004) Extra-embryonic vasculature development is regulated by the transcription factor HAND1. *Development* 131:2195–2204.
- Morrow, M.A., Mayer, E.W., Perez, C.A., Adlam, M. and Siu, G. (1999) Overexpression of the helix-loop-helix protein Id2 blocks T cell development at multiple stages. *Mol Immunol* 36:491–503.
- Muir, T., Sadler-Riggleman, I. and Skinner, M.K. (2005) Role of the basic helix-loop-helix transcription factor, scleraxis, in the regulation of Sertoli cell function and differentiation. *Mol Endocrinol* 19:2164–2174.
- Muir, T., Wilson-Rawls, J., Stevens, J.D., Rawls, A., Kang, C. and Skinner, M.K. (2008) Integration of CREB and bHLH transcriptional signaling pathways through direct heterodimerization of proteins. *Mol Reprod Develop*, doi 10.1002/mrd.20802.
- Murre, C., McCaw, P.S. and Baltimore, D. (1989) A new DNA binding and dimerization motif in immunoglobulin enhancer binding, daughterless, MyoD, and myc proteins. *Cell* 56:777–783.
- Nakada, Y., Hunsaker, T.L., Henke, R.M. and Johnson, J.E. (2004) Distinct domains within Mash1 and Math1 are required for function in neuronal differentiation versus neuronal cell-type specification. *Development* 131:1319–1330.
- Nef, S., Schaad, O., Stallings, N.R., Cederroth, C.R., Pitetti, J.L., Schaer, G., Malki, S., Dubois-Dauphin, M., Boizet-Bonhoure, B., Descombes, P., Parker, K.L. and Vassalli, J.D. (2005) Gene expression during sex determination reveals a robust female genetic program at the onset of ovarian development. *Dev Biol* 287:361–377.
- Paroush, Z., Finley, R.L. Jr, Kidd, T., Wainwright, S.M., Ingham, P.W., Brent, R. and Ish-Horowicz, D. (1994) Groucho is required for *Drosophila neurogenesis*, segmentation, and sex determination and interacts directly with hairy-related bHLH proteins. *Cell* 79:805–815.
- Pryce, B.A., Brent, A.E., Murchison, N.D., Tabin, C.J. and Schweitzer, R. (2007) Generation of transgenic tendon reporters, ScxGFP and ScxAP, using regulatory elements of the scleraxis gene. *Dev Dyn* 236:1677–1682.
- Rowlands, J.C. and Gustafsson, J.A. (1997) Aryl hydrocarbon receptor-mediated signal transduction. *Crit Rev Toxicol* 27:109–134.
- Skinner, M.K. (1991) Cell-cell interactions in the testis. *Endocr Rev* 12:45–77.
- Small, C.L., Shima, J.E., Uzumcu, M., Skinner, M.K. and Griswold, M.D. (2005) Profiling gene expression during the differentiation and development of the murine embryonic gonad. *Biol Reprod* 72:492–501.
- Stewart, H.J., Zoidl, G., Rossner, M., Brennan, A., Zoidl, C., Nave, K.A., Mirsky, R. and Jessen, K.R. (1997) Helix-loop-helix proteins in Schwann cells: a study of regulation and subcellular localization of Ids, REB, and E12/47 during embryonic and postnatal development. *J Neurosci Res* 50:684–701.
- Taelman, V., Van Wayenbergh, R., Solter, M., Pichon, B., Pieler, T., Christophe, D. and Bellefroid, E.J. (2004) Sequences downstream of the bHLH domain of the *Xenopus* hairy-related transcription factor-1 act as an extended dimerization domain that contributes to the selection of the partners. *Dev Biol* 276:47–63.
- Tam, S.K., Gu, W., Mahdavi, V. and Nadal-Ginard, B. (1995) Cardiac myocyte terminal differentiation. Potential for cardiac regeneration. *Ann NY Acad Sci* 752:72–79.
- Tang, H., Veldman, M.B. and Goldman, D. (2006) Characterization of a muscle-specific enhancer in human MuSK promoter reveals the essential role of myogenin in controlling activity-dependent gene regulation. *J Biol Chem* 281:3943–3953.
- Taylor, B.L. and Zhulin, I.B. (1999) PAS domains: internal sensors of oxygen, redox potential, and light. *Microbiol Mol Biol Rev* 63:479–506.
- Temchura, V.V., Frericks, M., Nacken, W. and Esser, C. (2005) Role of the aryl hydrocarbon receptor in thymocyte emigration in vivo. *Eur J Immunol* 35:2738–2747.
- Thatikunta, P., Qin, W., Christy, B.A., Tennekoon, G.I. and Rutkowski, J.L. (1999) Reciprocal Id expression and myelin gene regulation in Schwann cells. *Mol Cell Neurosci* 14:519–528.
- Thattaliyath, B.D., Firulli, B.A. and Firulli, A.B. (2002) The basic-helix-loop-helix transcription factor HAND2 directly regulates transcription of the atrial natriuretic peptide gene. *J Mol Cell Cardiol* 34:1335–1344.
- Thompson, J.A., Gold, P.J. and Fefer, A. (1997) Outpatient chemoimmunotherapy for the treatment of metastatic melanoma. *Semin Oncol* 24:S44–S48.
- Toledo-Ortiz, G., Huq, E. and Quail, P.H. (2003) The Arabidopsis basic/helix-loop-helix transcription factor family. *Plant Cell* 15:1749–1770.
- van Cruchten, I., Cinato, E., Fox, M., King, E.R., Newton, J.S., Riechmann, V. and Sablitzky, F. (1998) Structure, chromosomal localisation and expression of the murine dominant negative helix-loop-helix Id4 gene. *Biochim Biophys Acta* 1443:55–64.
- Vinson, C., Acharya, A. and Taparowsky, E.J. (2006) Deciphering B-ZIP transcription factor interactions in vitro and in vivo. *Biochim Biophys Acta* 1759:4–12.
- Wei, Q. and Paterson, B.M. (2001) Regulation of MyoD function in the dividing myoblast. *FEBS Lett* 490:171–178.
- Yang, C., Boucher, F., Tremblay, A. and Michaud, J.L. (2004) Regulatory interaction between arylhydrocarbon receptor and SIM1, two basic helix-loop-helix PAS proteins involved in the control of food intake. *J Biol Chem* 279:9306–9312.
- Yoshikawa, K. (2000) Cell cycle regulators in neural stem cells and postmitotic neurons. *Neurosci Res* 37:1–14.

---

## Supporting Information

Additional Supporting Information may be found in the online version of this article:

**Table S1.** bHLH gene family nomenclature.

**Table S2.** Species distribution of bHLH homolog.

**Fig. S1.** Mouse bHLH super-tree for the 5 different clades and all 107 genes with the cellular expression of specific genes listed for Sertoli, Schwann, thymic and

muscle cells. The expression is shown in the pie chart diagrams for each gene.

Please note: Blackwell Publishing are not responsible for the content or functionality of

any supporting materials supplied by the authors. Any queries (other than missing material) should be directed to the corresponding author for the article.

Supplemental Table S1  
bHLH Gene Family Nomenclature

| New name | Current name | GenBank # | Subtree |
|----------|--------------|-----------|---------|
| bHLHa1   | H-NEUROD2    | NP006151  | 1       |
| bHLHa1   | H-NEURODRF   | BAA77569  | 1       |
| bHLHa1   | M-NEUROD2    | Q62414    | 1       |
| bHLHa1   | R-NEUROD2    | NP062199  | 1       |
| bHLHa2   | H-MYO51      | AAG43167  | 1       |
| bHLHa2   | H-NEX1       | AAP97259  | 1       |
| bHLHa2   | H-NEUROD6    | NP073565  | 1       |
| bHLHa2   | R-NEX1       | XP575489  | 1       |
| bHLHa3   | H-BETA2      | BAA36519  | 1       |
| bHLHa3   | H-NEUROD1    | NP002491  | 1       |
| bHLHa3   | M-NEUROD1    | NP035024  | 1       |
| bHLHa3   | R-NEUROD1    | NP062091  | 1       |
| bHLHa3   | M-UPP        | BAC25725  | 1       |
| bHLHa3   | M-NEUROD(e)  | AAC52203  | 1       |
| bHLHa3   | H-NEUROD(e)  | AAC51318  | 1       |
| bHLHa4   | H-NEUROD4    | NP067014  | 1       |
| bHLHa4   | M-NEUROD4    | NP031527  | 1       |
| bHLHa4   | R-ATOH3H     | XP222370  | 1       |
| bHLHa5   | C-C34E107    | NP498115  | 1       |
| bHLHa6   | H-NEUROD3(e) | AAB37575  | 1       |
| bHLHa6   | H-NEUROG1    | NP006152  | 1       |
| bHLHa6   | M-NEUROG1    | NP035026  | 1       |
| bHLHa6   | R-NEUROD3    | NP062080  | 1       |
| bHLHa7   | H-NEUROG3    | NP066279  | 1       |
| bHLHa7   | H-UNK3       | AAH74939  | 1       |
| bHLHa7   | M-NEUROG3    | NP033849  | 1       |
| bHLHa7   | R-NEUROG3    | NP067732  | 1       |
| bHLHa8   | H-NEUROG2    | NP076924  | 1       |
| bHLHa8   | M-NEUROG2    | NP033848  | 1       |
| bHLHa8   | R-UNK3(e)    | XP227716  | 1       |
| bHLHa9   | C-C44C108    | NP509952  | 1       |
| bHLHa9   | D-CG5005     | NP477302  | 1       |
| bHLHa9   | C-T24B86     | NP495938  | 1       |
| bHLHa9   | C-T05G52     | NP499150  | 1       |
| bHLHa9   | M-UNK2(e)    | CAI25286  | 1       |
| bHLHa10  | D-CG10393    | NP477446  | 1       |
| bHLHa10  | C-C28C128    | NP501445  | 1       |
| bHLHa10  | C-T14F95     | NP508410  | 1       |
| bHLHa10  | D-CG7508     | NP731223  | 1       |
| bHLHa11  | C-C02B84     | NP509367  | 1       |
| bHLHa11  | C-Y69E1A3    | NP500236  | 1       |

|         |            |          |   |
|---------|------------|----------|---|
| bHLHa12 | D-CG7760   | NP477344 | 1 |
| bHLHa13 | H-ATOH7    | NP660161 | 1 |
| bHLHa13 | M-ATOH7    | NP058560 | 1 |
| bHLHa13 | R-MATH5(e) | XP345103 | 1 |
| bHLHa14 | H-ATOH1    | NP005163 | 1 |
| bHLHa14 | M-ATOH1    | NP031526 | 1 |
| bHLHa15 | H-MIST1    | NP803238 | 1 |
| bHLHa15 | M-MIST1    | NP034930 | 1 |
| bHLHa15 | R-MIST1    | NP036995 | 1 |
| bHLHa16 | D-CG8667   | NP523611 | 1 |
| bHLHa17 | H-SCL(e)   | AAA36598 | 1 |
| bHLHa17 | H-TAL1     | NP003180 | 1 |
| bHLHa17 | M-SCL(e)   | CAB72256 | 1 |
| bHLHa17 | M-TAL1     | NP035657 | 1 |
| bHLHa17 | R-SCL(e)   | XP233430 | 1 |
| bHLHa18 | H-UNK1(e)  | AAA88084 | 1 |
| bHLHa18 | H-LYL1     | NP005574 | 1 |
| bHLHa18 | M-LYL2(e)  | B43814   | 1 |
| bHLHa18 | M-UNK1(e)  | BAC36194 | 1 |
| bHLHa18 | M-LYL1     | NP032561 | 1 |
| bHLHa19 | H-TAL2     | NP005412 | 1 |
| bHLHa19 | R-TAL2(e)  | XP345532 | 1 |
| bHLHa19 | M-TAL2     | NP033343 | 1 |
| bHLHa20 | D-CG2655   | NP525055 | 1 |
| bHLHa21 | H-ATOH8    | NP116216 | 1 |
| bHLHa21 | M-ATOH8    | NP722473 | 1 |
| bHLHa21 | R-MATH6    | XP575552 | 1 |
| bHLHa21 | M-UNK3(e)  | BAC25499 | 1 |
| bHLHa22 | H-MUSC(e)  | AAH06313 | 1 |
| bHLHa22 | H-MUSC     | NP005089 | 1 |
| bHLHa22 | M-MUSC     | NP034957 | 1 |
| bHLHa22 | R-MUSC     | XP232587 | 1 |
| bHLHa23 | H-TCF21    | NP938206 | 1 |
| bHLHa23 | M-TCF21    | NP035675 | 1 |
| bHLHa23 | R-COR1(e)  | XP341738 | 1 |
| bHLHa24 | H-TCF23    | XP372923 | 1 |
| bHLHa24 | M-TCF23    | NP444315 | 1 |
| bHLHa24 | R-OUT(e)   | XP345644 | 1 |
| bHLHa25 | H-UNK2(e)  | DAA00306 | 1 |
| bHLHa25 | R-UNK2     | XP578439 | 1 |
| bHLHa26 | H-HAND2    | NP068808 | 1 |
| bHLHa26 | R-HAND2    | NP073187 | 1 |
| bHLHa26 | M-HAND2    | NP034532 | 1 |
| bHLHa26 | M-DHAND(e) | AAC52338 | 1 |
| bHLHa26 | M-HED(e)   | AAA86274 | 1 |

|         |              |          |   |
|---------|--------------|----------|---|
| bHLHa27 | H-HAND1      | NP004812 | 1 |
| bHLHa27 | M-HXT(e)     | AAA86273 | 1 |
| bHLHa27 | M-HAND1      | NP032239 | 1 |
| bHLHa27 | R-HAND1      | NP067603 | 1 |
| bHLHa28 | D-CG18144    | NP609370 | 1 |
| bHLHa29 | H-PTF1       | NP835455 | 1 |
| bHLHa29 | M-PTF1A      | NP061279 | 1 |
| bHLHa29 | R-PTF1A      | NP446416 | 1 |
| bHLHa30 | D-CG33323    | NP996177 | 1 |
| bHLHa31 | M-FERD3I     | NP277057 | 1 |
| bHLHa31 | R-FER3(e)    | XP345659 | 1 |
| bHLHa32 | D-CG6913     | NP524322 | 1 |
| bHLHa33 | C-F48D63     | NP508725 | 1 |
| bHLHa33 | D-CG5952     | NP524376 | 1 |
| bHLHa34 | H-NHLH2      | NP005590 | 1 |
| bHLHa34 | M-HEN2       | Q64221   | 1 |
| bHLHa34 | M-NHLH2      | NP848892 | 1 |
| bHLHa34 | R-NESC(e)    | XP227524 | 1 |
| bHLHa35 | H-NHLH1      | NP005589 | 1 |
| bHLHa35 | M-NHLH1      | NP035046 | 1 |
| bHLHa35 | R-UNK1(e)    | XP222898 | 1 |
| bHLHa36 | D-CG3052     | NP476989 | 1 |
| bHLHa37 | C-C43H68     | NP508440 | 1 |
| bHLHa38 | H-TWIST      | NP000465 | 1 |
| bHLHa38 | M-TWIST1     | NP035788 | 1 |
| bHLHa38 | R-TWIST1     | NP445982 | 1 |
| bHLHa39 | H-TWIST2(e)  | AAH33168 | 1 |
| bHLHa39 | M-TWIST2     | NP031881 | 1 |
| bHLHa40 | H-TCF15      | NP004600 | 1 |
| bHLHa40 | M-TCF15      | NP033354 | 1 |
| bHLHa40 | R-TCF15(e)   | XP230722 | 1 |
| bHLHa41 | H-SCX        | DAA00239 | 1 |
| bHLHa41 | M-SCX        | NP942588 | 1 |
| bHLHa42 | H-ASCL3      | NP065697 | 1 |
| bHLHa42 | M-ASCL3      | NP064435 | 1 |
| bHLHa42 | R-PUTBHLH(e) | BAB83912 | 1 |
| bHLHa43 | C-F57C123    | NP508119 | 1 |
| bHLHa44 | H-ASCL4      | NP982260 | 1 |
| bHLHa44 | R-ASCL4(e)   | XP235013 | 1 |
| bHLHa45 | R-ASCL2      | NP113691 | 1 |
| bHLHa45 | H-ACSL2      | NP005161 | 1 |
| bHLHa45 | M-ASCL2      | NP032580 | 1 |
| bHLHa46 | H-ASCL1      | AAH31299 | 1 |
| bHLHa46 | R-ASCL1      | NP071779 | 1 |
| bHLHa46 | M-ACSL1      | NP032579 | 1 |

|         |             |          |   |
|---------|-------------|----------|---|
| bHLHb1  | A-BHLH13    | NP851021 | 2 |
| bHLHb1  | A-PIF3-1    | BAC56978 | 2 |
| bHLHb1  | A-PUT2      | AAN15368 | 2 |
| bHLHb1  | A-PUT1      | NP191465 | 2 |
| bHLHb1  | A-PTF-1     | AAM10954 | 2 |
| bHLHb2  | A-PIF4-2    | NP565991 | 2 |
| bHLHb2  | A-PIF4-1    | NP850381 | 2 |
| bHLHb2  | A-UNK2      | AAK25931 | 2 |
| bHLHb3  | A-BHLH12    | NP176820 | 2 |
| bHLHb3  | A-BHLH11    | NP198596 | 2 |
| bHLHb4  | A-BHLH10    | NP564293 | 2 |
| bHLHb4  | A-BHLH9     | NP680385 | 2 |
| bHLHb5  | A-BHLH8     | NP174355 | 2 |
| bHLHb5  | A-BHLH7     | NP181028 | 2 |
| bHLHb6  | A-BHLH6     | NP190602 | 2 |
| bHLHb6  | A-BHLH5     | NP201507 | 2 |
| bHLHb7  | A-EXP2      | NP566567 | 2 |
| bHLHb7  | A-UNK1      | AAG51338 | 2 |
| bHLHb8  | A-BHLH4     | NP564782 | 2 |
| bHLHb8  | A-F17       | AAF98179 | 2 |
| bHLHb9  | A-ERPR2     | NP566639 | 2 |
| bHLHb10 | A-BHLH3     | NP192426 | 2 |
| bHLHb10 | A-ERPR1     | NP193865 | 2 |
| bHLHb11 | H-USF1      | NP009053 | 2 |
| bHLHb11 | M-USF1      | NP033506 | 2 |
| bHLHb11 | R-USF1      | NP113965 | 2 |
| bHLHb12 | H-USF2      | NP003358 | 2 |
| bHLHb12 | R-USF2      | NP112401 | 2 |
| bHLHb13 | D-CG17592A  | NP572167 | 2 |
| bHLHb13 | D-CG17592B  | NP726931 | 2 |
| bHLHb14 | A-BHLH2     | NP188848 | 2 |
| bHLHb14 | C-T01D32    | NP506391 | 2 |
| bHLHb15 | S-CBF1      | NP012594 | 2 |
| bHLHb16 | S-TYE7      | NP014989 | 2 |
| bHLHb17 | D-CG2956    | NP523816 | 2 |
| bHLHb18 | C-T15H93    | NP496070 | 2 |
| bHLHb19 | H-SEF21A(e) | AAA60310 | 2 |
| bHLHb19 | H-TCF4      | NP003190 | 2 |
| bHLHb19 | R-MITF2(e)  | XP222520 | 2 |
| bHLHb19 | R-TCF4      | NP445821 | 2 |
| bHLHb19 | M-SEF2(e)   | CAA62868 | 2 |
| bHLHb19 | M-TCF4      | Q60722   | 2 |
| bHLHb19 | M-ME2(e)    | AAB32662 | 2 |
| bHLHb20 | H-TCF4C(e)  | NP996923 | 2 |
| bHLHb20 | H-TCF12     | NP003196 | 2 |

|         |                |          |   |
|---------|----------------|----------|---|
| bHLHb20 | M-TCF12        | NP035674 | 2 |
| bHLHb20 | R-TCF12        | NP037308 | 2 |
| bHLHb20 | R-REB3(e)      | AAB25128 | 2 |
| bHLHb20 | R-REBOX(e)     | AAB25129 | 2 |
| bHLHb21 | H-E47(e)       | AAC41693 | 2 |
| bHLHb21 | H-KAPPAE2BF(e) | AAA56830 | 2 |
| bHLHb21 | H-TCF3         | NP003191 | 2 |
| bHLHb21 | M-TCFIN(e)     | CAA35541 | 2 |
| bHLHb21 | R-PAN1(e)      | CAA44199 | 2 |
| bHLHb21 | R-TCFE2A(e)    | AAH78750 | 2 |
| bHLHb21 | M-TCFE2A       | P15806   | 2 |
| bHLHb21 | M-E2A          | BAA06218 | 2 |
| bHLHb21 | R-TCFE12(e)    | I78853   | 2 |
| bHLHb22 | D-CG5102       | P11420   | 2 |
| bHLHb23 | D-CG5545       | NP523592 | 2 |
| bHLHb24 | H-ID1A         | NP002156 | 2 |
| bHLHb24 | H-ID1B         | NP851998 | 2 |
| bHLHb24 | R-ID1          | NP036929 | 2 |
| bHLHb24 | M-ID1          | NP034625 | 2 |
| bHLHb25 | H-ID3          | NP002158 | 2 |
| bHLHb25 | M-ID3          | NP032347 | 2 |
| bHLHb25 | R-ID3          | AAH64658 | 2 |
| bHLHb26 | H-ID2          | NP002157 | 2 |
| bHLHb26 | M-ID2          | NP034626 | 2 |
| bHLHb26 | R-ID2          | NP037192 | 2 |
| bHLHb27 | H-ID4          | NP001537 | 2 |
| bHLHb27 | M-ID4          | NP112443 | 2 |
| bHLHb27 | R-ID4          | NP783172 | 2 |
| bHLHb28 | D-CG1007       | NP523876 | 2 |
| bHLHb29 | A-BHLH1        | NP177590 | 2 |
| bHLHb30 | A-EXP1         | NP566098 | 2 |
| bHLHb31 | H-HEY1         | NP036390 | 2 |
| bHLHb31 | M-HEY1         | AAH86635 | 2 |
| bHLHb32 | H-HEY2         | NP036391 | 2 |
| bHLHb32 | M-HEY2         | NP038932 | 2 |
| bHLHb33 | H-HEYL         | NP055386 | 2 |
| bHLHb33 | M-HEYL         | NP038933 | 2 |
| bHLHb34 | D-CG14548      | NP524505 | 2 |
| bHLHb34 | D-CG8333       | NP524504 | 2 |
| bHLHb35 | D-CG8361       | NP536753 | 2 |
| bHLHb36 | D-CG6096       | NP524511 | 2 |
| bHLHb36 | D-CG8365       | NP524513 | 2 |
| bHLHb37 | M-HES3         | NP032263 | 2 |
| bHLHb37 | R-HES3         | NP073178 | 2 |
| bHLHb37 | H-HES7         | NP115969 | 2 |

|         |            |             |   |
|---------|------------|-------------|---|
| bHLHb37 | M-HES7     | NP149030    | 2 |
| bHLHb38 | M-HES5     | NP034549    | 2 |
| bHLHb38 | R-HES5     | NP077359    | 2 |
| bHLHb39 | H-HES1     | NP005515    | 2 |
| bHLHb39 | M-HES1     | NP032261    | 2 |
| bHLHb39 | R-HES1     | NP077336    | 2 |
| bHLHb39 | H-HES4     | NP066993    | 2 |
| bHLHb40 | M-HES2     | NP032262    | 2 |
| bHLHb40 | R-HES2     | NP062109    | 2 |
| bHLHc1  | H-MYF3(e)  | CAA35640    | 3 |
| bHLHc1  | H-MYOD     | NP002469    | 3 |
| bHLHc1  | M-MYOD1    | P10085      | 3 |
| bHLHc1  | R-MYOD1    | NP788268    | 3 |
| bHLHc2  | H-MYF5     | NP005584    | 3 |
| bHLHc2  | M-MYF5     | NP032682    | 3 |
| bHLHc2  | R-MYF5(e)  | XP235101    | 3 |
| bHLHc3  | H-MYF4(e)  | AAP35897    | 3 |
| bHLHc3  | M-MYOG     | AAH48683    | 3 |
| bHLHc3  | R-MYOG     | NP058811    | 3 |
| bHLHc4  | H-MYF6     | NP002460    | 3 |
| bHLHc4  | M-MYF6     | NP032683    | 3 |
| bHLHc4  | R-MYF6     | NP037304    | 3 |
| bHLHc5  | H-MP1      | NP061140    | 3 |
| bHLHc5  | M-MESP1    | NP032614    | 3 |
| bHLHc5  | R-MESP1    | XP218826    | 3 |
| bHLHc6  | M-MESP2    | NP032615    | 3 |
| bHLHc6  | R-MESP2(e) | XP218825    | 3 |
| bHLHc7  | A-BHLH46   | NP195114    | 3 |
| bHLHc7  | D-CG12952A | NP524287    | 3 |
| bHLHc7  | D-CG12952B | NP731326    | 3 |
| bHLHc8  | H-FGA      | NP001004311 | 3 |
| bHLHc8  | M-FIGLA    | NP036143    | 3 |
| bHLHc9  | D-CG7659   | NP524124    | 3 |
| bHLHc10 | D-CG441    | NP524516    | 3 |
| bHLHc11 | H-MXI1a    | NP005953    | 3 |
| bHLHc11 | H-MXI1b    | NP569157    | 3 |
| bHLHc11 | R-MXI1     | NP037292    | 3 |
| bHLHc11 | M-MXI1     | NP034977    | 3 |
| bHLHc11 | M-MAD      | P50538      | 3 |
| bHLHc12 | H-MAD4     | NP006445    | 3 |
| bHLHc12 | M-MAD4     | NP034883    | 3 |
| bHLHc12 | M-MXD4     | Q60948      | 3 |
| bHLHc13 | H-MXD3     | NP112590    | 3 |
| bHLHc13 | M-MXD3     | NP057871    | 3 |
| bHLHc13 | R-MXD3     | NP665716    | 3 |



|         |           |          |   |
|---------|-----------|----------|---|
| bHLHc14 | D-CG6494  | NP523997 | 3 |
| bHLHc14 | D-CG8328  | NP524503 | 3 |
| bHLHc14 | D-CG8346  | NP524509 | 3 |
| bHLHc15 | C-R03E91  | NP509136 | 3 |
| bHLHc16 | A-BHLH45  | NP181657 | 3 |
| bHLHc16 | A-PTF-3   | AAM10940 | 3 |
| bHLHc16 | A-PTF-2   | AAM10941 | 3 |
| bHLHc17 | A-PAD     | AAC34218 | 3 |
| bHLHc17 | A-BHLH44  | NP199992 | 3 |
| bHLHc18 | A-FO      | AAF88076 | 3 |
| bHLHc19 | A-BHLH43  | NP181646 | 3 |
| bHLHc19 | A-BHLH42  | NP191236 | 3 |
| bHLHc19 | A-BHLH41  | NP189199 | 3 |
| bHLHc19 | A-BHLH40  | NP564944 | 3 |
| bHLHc20 | A-BHLH39  | NP181549 | 3 |
| bHLHc21 | D-CG5927  | NP525094 | 3 |
| bHLHc22 | C-T01E82  | NP496204 | 3 |
| bHLHc23 | H-HES6    | NP061115 | 3 |
| bHLHc24 | H-HES2    | CAB46199 | 3 |
| bHLHc25 | C-Y54G2A1 | NP500281 | 3 |
| bHLHc26 | A-BHLH37  | NP563749 | 3 |
| bHLHc26 | A-BHLH38  | NP181843 | 3 |
| bHLHc26 | A-BHLH36  | NP181757 | 3 |
| bHLHc27 | A-UNK4    | NP683482 | 3 |
| bHLHc28 | C-C18A38  | NP495131 | 3 |
| bHLHc28 | D-CG3786  | NP476694 | 3 |
| bHLHc28 | D-CG3839  | NP476623 | 3 |
| bHLHc28 | D-CG3827  | NP476803 | 3 |
| bHLHc29 | A-BHLH34  | NP179861 | 3 |
| bHLHc29 | A-BHLH35  | NP179860 | 3 |
| bHLHc30 | A-BHLH33  | NP569014 | 3 |
| bHLHc31 | A-BHLH32  | NP177064 | 3 |
| bHLHc31 | A-BHLH31  | NP198702 | 3 |
| bHLHc32 | A-BHLH30  | NP175518 | 3 |
| bHLHc32 | A-BHLH29  | NP567431 | 3 |
| bHLHc33 | A-BHLH28  | NP568850 | 3 |
| bHLHc33 | A-BHLH27  | NP201335 | 3 |
| bHLHc34 | C-DY33    | NP492372 | 3 |
| bHLHc34 | C-F38C22  | NP502928 | 3 |
| bHLHc35 | A-BHLH26  | NP175399 | 3 |
| bHLHc35 | A-BHLH25  | NP199178 | 3 |
| bHLHc36 | A-EXP7    | NP201239 | 3 |
| bHLHc36 | A-EXP6    | NP199812 | 3 |
| bHLHc37 | S-INO2    | NP010408 | 3 |
| bHLHc37 | S-PHO4    | NP116692 | 3 |

|         |            |             |   |
|---------|------------|-------------|---|
| bHLHc38 | A-TIF      | AAK96799    | 3 |
| bHLHc38 | A-HYP1     | CAB71865    | 3 |
| bHLHc39 | A-BHLH24   | NP196430    | 3 |
| bHLHc40 | A-BHLH23   | NP200609    | 3 |
| bHLHc41 | M-TFAP4    | NP112459    | 3 |
| bHLHc42 | D-CG11450  | NP524820    | 3 |
| bHLHc43 | A-PP-1     | CAB79132    | 3 |
| bHLHc44 | A-BHLH22   | NP195330    | 3 |
| bHLHc45 | S-RTG1     | NP014574    | 3 |
| bHLHc46 | C-F40G911  | NP497173    | 3 |
| bHLHc47 | A-PIF3-2   | BAC10690    | 3 |
| bHLHc48 | C-M05B55   | NP492034    | 3 |
| bHLHc49 | A-UNK3     | AAM67566    | 3 |
| bHLHc50 | A-P50      | NP195468    | 3 |
| bHLHc51 | A-EXP5     | NP194747    | 3 |
| bHLHc52 | A-EXP4     | NP563839    | 3 |
| bHLHc52 | A-EXP3     | NP566260    | 3 |
| bHLHc53 | A-BHLH20   | NP196537    | 3 |
| bHLHc53 | A-BHLH21   | NP191923    | 3 |
| bHLHc54 | A-BHLH19   | NP172483    | 3 |
| bHLHc54 | A-BHLH18   | NP189011    | 3 |
| bHLHc55 | A-BHLH17   | NP195179    | 3 |
| bHLHc56 | A-BHLH16   | NP568745    | 3 |
| bHLHc56 | A-BHLH15   | NP177524    | 3 |
| bHLHc57 | A-BHLH14   | NP201067    | 3 |
| bHLHd1  | H-SREBF1A  | NP001005291 | 4 |
| bHLHd1  | H-SREBF1B  | NP004167    | 4 |
| bHLHd1  | M-SREBF1   | NP035610    | 4 |
| bHLHd1  | R-ADD1     | A48085      | 4 |
| bHLHd1  | R-SREBP1C  | AAG28734    | 4 |
| bHLHd2  | H-SREBF2   | NP004590    | 4 |
| bHLHd2  | M-SREBF2   | XP127995    | 4 |
| bHLHd3  | H-MNT      | Q99583      | 4 |
| bHLHd3  | M-MNT      | CAI24246    | 4 |
| bHLHd4  | H-MAXD     | NP660089    | 4 |
| bHLHd5  | H-MAXF     | NP932061    | 4 |
| bHLHd6  | H-MAXA     | NP002373    | 4 |
| bHLHd6  | M-MAX      | NP032584    | 4 |
| bHLHd6  | H-MAXB     | NP660087    | 4 |
| bHLHd7  | H-MAXC     | NP660088    | 4 |
| bHLHd8  | H-MAXE     | NP660092    | 4 |
| bHLHd9  | D-CG9648   | NP649097    | 4 |
| bHLHd10 | C-F46G106  | NP510223    | 4 |
| bHLHd11 | C-F38A63   | NP505856    | 4 |
| bHLHd12 | D-CG18362A | NP724325    | 4 |

|         |             |          |   |
|---------|-------------|----------|---|
| bHLHd12 | D-CG18362B  | NP610105 | 4 |
| bHLHd12 | D-CG18362C  | NP724326 | 4 |
| bHLHd12 | D-CG18362E  | NP724327 | 4 |
| bHLHd12 | D-CG18362D  | NP724328 | 4 |
| bHLHd13 | M-TCFL4     | NP035680 | 4 |
| bHLHd13 | H-WBSCR14   | NP937848 | 4 |
| bHLHd13 | D-CG3350    | NP651556 | 4 |
| bHLHe1  | H-ARNT2     | NP055677 | 5 |
| bHLHe1  | R-ARNT2     | NP036913 | 5 |
| bHLHe1  | M-ARNT2     | NP031514 | 5 |
| bHLHe2  | H-ARNT      | CAI12797 | 5 |
| bHLHe2  | M-ARNT      | NP033839 | 5 |
| bHLHe2  | R-ARNT      | NP036912 | 5 |
| bHLHe3  | C-C25A111   | NP492687 | 5 |
| bHLHe4  | D-CG11987   | NP731308 | 5 |
| bHLHe5  | H-ARNTL     | NP001169 | 5 |
| bHLHe5  | M-ARNTL     | NP031515 | 5 |
| bHLHe5  | R-ARNTL     | NP077338 | 5 |
| bHLHe6  | H-ARNTL2    | NP064568 | 5 |
| bHLHe6  | M-ARNTL2    | NP758513 | 5 |
| bHLHe7  | D-CG8727    | NP524168 | 5 |
| bHLHe8  | H-CLOCK     | O15516   | 5 |
| bHLHe8  | M-CLOCK     | NP031741 | 5 |
| bHLHe8  | R-CLOCK     | NP068628 | 5 |
| bHLHe9  | H-NPAS2     | Q99743   | 5 |
| bHLHe9  | M-NPAS2     | NP032745 | 5 |
| bHLHe10 | D-CG7391    | NP996021 | 5 |
| bHLHe11 | H-NPAS1     | NP002508 | 5 |
| bHLHe11 | M-NPAS1     | NP032744 | 5 |
| bHLHe12 | H-NPAS3     | NP775182 | 5 |
| bHLHe12 | M-NPAS3     | NP038808 | 5 |
| bHLHe13 | D-CG6883    | NP523872 | 5 |
| bHLHe14 | H-SIM1      | NP005059 | 5 |
| bHLHe14 | M-SIM1      | NP035506 | 5 |
| bHLHe15 | H-SIM2      | NP005060 | 5 |
| bHLHe15 | M-SIM2      | NP035507 | 5 |
| bHLHe16 | D-CG7771    | NP731771 | 5 |
| bHLHe17 | H-HIF3A     | NP690007 | 5 |
| bHLHe17 | M-HIF3A     | NP058564 | 5 |
| bHLHe17 | R-HIF3A     | NP071973 | 5 |
| bHLHe17 | H-EPAS1     | NP001421 | 5 |
| bHLHe18 | C-41G75     | NP492530 | 5 |
| bHLHe19 | H-BHLHB1(e) | AAF61215 | 5 |
| bHLHe19 | M-OLIG2     | NP058663 | 5 |
| bHLHe19 | R-OLIG2(e)  | XP221668 | 5 |

|         |               |          |   |
|---------|---------------|----------|---|
| bHLHe19 | H-OLIG2       | NP005797 | 5 |
| bHLHe20 | H-OLIG3       | CAI20348 | 5 |
| bHLHe20 | M-OLIG3       | NP443734 | 5 |
| bHLHe20 | R-OLIG3(e)    | XP218772 | 5 |
| bHLHe21 | H-OLIG1VAR(e) | BAD93028 | 5 |
| bHLHe21 | M-OLIG1       | NP058664 | 5 |
| bHLHe21 | R-OLIG1       | NP068538 | 5 |
| bHLHe21 | H-OLIG1       | NP620450 | 5 |
| bHLHe22 | H-BHLHB5      | NP689627 | 5 |
| bHLHe22 | M-BHLHB5      | NP067535 | 5 |
| bHLHe22 | R-BETA2       | XP345191 | 5 |
| bHLHe23 | H-BHLHB4      | CAD37449 | 5 |
| bHLHe23 | M-BHLHB4      | NP542372 | 5 |
| bHLHe24 | A-BHLH70      | NP180680 | 5 |
| bHLHe24 | A-BHLH71      | NP180679 | 5 |
| bHLHe25 | A-BHLH69      | NP177366 | 5 |
| bHLHe25 | A-BHLH68      | NP189056 | 5 |
| bHLHe26 | A-BHLH67      | NP176552 | 5 |
| bHLHe26 | A-BHLH66      | NP680372 | 5 |
| bHLHe27 | A-MYC         | NP191957 | 5 |
| bHLHe28 | A-BHLH65      | NP192720 | 5 |
| bHLHe29 | A-BHLH64      | NP179283 | 5 |
| bHLHe29 | A-BTF         | AAC64222 | 5 |
| bHLHe30 | A-BHLH63      | NP195520 | 5 |
| bHLHe31 | A-BHLH60      | NP199495 | 5 |
| bHLHe31 | A-BHLH62      | NP193376 | 5 |
| bHLHe31 | A-BHLH61      | NP567195 | 5 |
| bHLHe31 | A-BHLH59      | NP195791 | 5 |
| bHLHe32 | H-MITF        | I38024   | 5 |
| bHLHe32 | M-MITF        | NP032627 | 5 |
| bHLHe32 | R-MITF        | XP232215 | 5 |
| bHLHe33 | H-TCFE3       | NP006512 | 5 |
| bHLHe33 | M-TCFE3       | NP766060 | 5 |
| bHLHe34 | H-TCFEC       | NP036384 | 5 |
| bHLHe34 | M-TCFEC       | NP112475 | 5 |
| bHLHe35 | H-TFEB        | NP009093 | 5 |
| bHLHe35 | M-TCFEB       | NP035679 | 5 |
| bHLHe36 | H-MONDOA      | NP055753 | 5 |
| bHLHe36 | M-WBSCR14     | NP067430 | 5 |
| bHLHe37 | H-MYCN        | P04198   | 5 |
| bHLHe37 | R-MYCS        | NP068609 | 5 |
| bHLHe37 | M-NMYC1       | NP032735 | 5 |
| bHLHe38 | H-MYCL1       | P12524   | 5 |
| bHLHe38 | M-LMYC1       | P10166   | 5 |
| bHLHe39 | H-MYC         | NP002458 | 5 |

|         |            |          |   |
|---------|------------|----------|---|
| bHLHe39 | M-MYC      | P01108   | 5 |
| bHLHe39 | R-MYC      | NP036735 | 5 |
| bHLHe40 | H-BHLHB2   | NP003661 | 5 |
| bHLHe40 | M-BHLHB2   | NP035628 | 5 |
| bHLHe40 | R-BHLHB2   | NP445780 | 5 |
| bHLHe41 | R-BHLHB3   | NP579837 | 5 |
| bHLHe41 | M-BHLHB3   | NP077789 | 5 |
| bHLHe41 | H-BHLHB3   | NP110389 | 5 |
| bHLHe42 | H-NCOA11   | NP003734 | 5 |
| bHLHe42 | H-NCOA13   | NP671766 | 5 |
| bHLHe42 | H-NCOA12   | NP671756 | 5 |
| bHLHe42 | M-NCOA1    | NP035011 | 5 |
| bHLHe42 | H-NCOA3    | CAI42141 | 5 |
| bHLHe43 | D-CG13316A | NP570071 | 5 |
| bHLHe43 | D-CG13316B | NP726879 | 5 |
| bHLHe44 | D-CG1194   | NP523657 | 5 |
| bHLHe45 | A-ERFP     | NP194639 | 5 |
| bHLHe46 | C-C17C31   | NP495065 | 5 |
| bHLHe46 | C-C17C37   | NP495063 | 5 |
| bHLHe47 | C-F31A32   | NP510838 | 5 |
| bHLHe47 | C-F31A34   | NP510837 | 5 |
| bHLHe48 | A-BHLH58   | NP200506 | 5 |
| bHLHe48 | A-T10024   | AAD39586 | 5 |
| bHLHe49 | D-CG17100  | NP524775 | 5 |
| bHLHe50 | D-CG8704   | NP476923 | 5 |
| bHLHe51 | D-CG10446  | NP523599 | 5 |
| bHLHe52 | A-EXP9     | NP189001 | 5 |
| bHLHe53 | A-BHLH57   | NP188770 | 5 |
| bHLHe54 | A-CDP      | NP565839 | 5 |
| bHLHe55 | A-PTF-5    | AAM10949 | 5 |
| bHLHe56 | D-CG7951   | NP524584 | 5 |
| bHLHe57 | D-CG10798  | NP525062 | 5 |
| bHLHe58 | A-PIF3-3   | NP849626 | 5 |
| bHLHe59 | D-CG1705   | NP511126 | 5 |
| bHLHe60 | A-BHLH56   | NP172746 | 5 |
| bHLHe61 | A-ERPR4    | NP174087 | 5 |
| bHLHe62 | A-ERPR3    | NP188700 | 5 |
| bHLHe63 | D-CG7664   | NP476605 | 5 |
| bHLHe64 | C-Y7D3B7   | NP499472 | 5 |
| bHLHe65 | S-RTG3     | NP009447 | 5 |
| bHLHe66 | S-HMS1     | NP014675 | 5 |
| bHLHe67 | A-PUT3     | CAB86924 | 5 |
| bHLHe68 | A-BHLH55   | NP195372 | 5 |
| bHLHe68 | A-PTF-4    | AAN18284 | 5 |
| bHLHe68 | A-BHLH54   | NP849508 | 5 |

|         |          |          |   |
|---------|----------|----------|---|
| bHLHe69 | A-EXP8   | AAD15506 | 5 |
| bHLHe70 | A-BHLH53 | NP173950 | 5 |
| bHLHe70 | A-BHLH52 | NP177058 | 5 |
| bHLHe71 | A-BHLH51 | NP187390 | 5 |
| bHLHe71 | A-BHLH50 | NP199667 | 5 |
| bHLHe72 | A-BHLH49 | NP180003 | 5 |
| bHLHe72 | A-BHLH48 | NP194827 | 5 |
| bHLHe72 | A-BHLH47 | NP567245 | 5 |
| bHLHf1  | A-PP-2   | CAA22971 | 6 |
| bHLHf1  | A-PTF-8  | CAD58595 | 6 |
| bHLHf2  | A-BHLH86 | NP194608 | 6 |
| bHLHf2  | A-BHLH85 | NP974634 | 6 |
| bHLHf3  | A-PTF-7  | CAE12173 | 6 |
| bHLHf4  | A-BHLH84 | NP179608 | 6 |
| bHLHf4  | A-BHLH83 | NP849996 | 6 |
| bHLHf5  | A-AT     | AAS79546 | 6 |
| bHLHf5  | A-BHLH82 | NP200935 | 6 |
| bHLHf5  | A-HYP3   | CAG25857 | 6 |
| bHLHf5  | A-UNK6   | BAB08482 | 6 |
| bHLHf5  | A-PTF-6  | AAP86213 | 6 |
| bHLHf6  | A-BHLH81 | NP201512 | 6 |
| bHLHf6  | A-PBHLH2 | BAD43719 | 6 |
| bHLHf6  | A-UNK5   | AAM61195 | 6 |
| bHLHf6  | A-SPT    | NP568010 | 6 |
| bHLHf7  | A-BHLH80 | NP182220 | 6 |
| bHLHf7  | A-HYP2   | AAO37214 | 6 |
| bHLHf7  | A-HFR1   | NP563650 | 6 |
| bHLHf7  | A-PBHLH1 | BAC41923 | 6 |
| bHLHf8  | A-BHLH79 | NP174776 | 6 |
| bHLHf8  | A-BHLH78 | NP192657 | 6 |
| bHLHf9  | A-BHLH77 | NP191916 | 6 |
| bHLHf10 | A-BHLH76 | NP182204 | 6 |
| bHLHf10 | A-BHLH75 | NP567121 | 6 |
| bHLHf10 | A-BHLH73 | NP187263 | 6 |
| bHLHf10 | A-BHLH72 | NP200133 | 6 |
| bHLHf10 | A-BHLH74 | NP192055 | 6 |

Supplemental Table S2  
Species Distribution of bHLH Homologs

| Names   | Human                           | Rat      | Mouse                         | Drosophila         | C. Elegans                    | Yeast | Arabidopsis |
|---------|---------------------------------|----------|-------------------------------|--------------------|-------------------------------|-------|-------------|
| bHLHa1  | Neurod2,<br>Neurodrf            | Neurod2  | Neurod2                       |                    |                               |       |             |
| bHLHa2  | Myo51,<br>Nex1,<br>Neurod6      | Nex1     |                               |                    |                               |       |             |
| bHLHa3  | Beta2,<br>Neurod1,<br>Neurod(e) | Neurod1  | Neurod1,<br>Upp,<br>Neurod(e) |                    |                               |       |             |
| bHLHa4  | Neurod4                         | Atoh3h   | Neurod4                       |                    |                               |       |             |
| bHLHa5  |                                 |          |                               |                    | C34E107                       |       |             |
| bHLHa6  | Neurod3(e),<br>Neurog1          | Neurod3  | Neurog1                       |                    |                               |       |             |
| bHLHa7  | Neurog3,<br>Unk3                | Neurog3  | Neurog3                       |                    |                               |       |             |
| bHLHa8  | Neurog2                         | Unk3(e)  | Neurog2                       |                    |                               |       |             |
| bHLHa9  |                                 |          | Unk2(e)                       | CG5005             | C44C108,<br>T24B86,<br>T05G52 |       |             |
| bHLHa10 |                                 |          |                               | CG10393,<br>CG7508 | C28C128,<br>T14F95            |       |             |
| bHLHa11 |                                 |          |                               |                    | C02B84,<br>Y69E1A3            |       |             |
| bHLHa12 |                                 |          |                               | CG7760             |                               |       |             |
| bHLHa13 | Atoh7                           | Math5(e) | Atoh7                         |                    |                               |       |             |
| bHLHa14 | Atoh1                           |          | Atoh1                         |                    |                               |       |             |
| bHLHa15 | Mist1                           | Mist1    | Mist1                         |                    |                               |       |             |
| bHLHa16 |                                 |          |                               | CG8667             |                               |       |             |
| bHLHa17 | Scl(e), Tal1                    | Scl(e)   | Tal1, Scl(e)                  |                    |                               |       |             |
| bHLHa18 | Unk1(e), Lyl1                   |          | Lyl2(e),<br>Unk1(e),<br>Lyl1  |                    |                               |       |             |
| bHLHa19 | Tal2                            | Tal2(e)  | Tal2                          |                    |                               |       |             |
| bHLHa20 |                                 |          |                               | CG2655             |                               |       |             |
| bHLHa21 | Atoh8                           | Math6    | Atoh8,<br>Unk3(e)             |                    |                               |       |             |
| bHLHa22 | Musc(e),<br>Musc                | Musc     | Musc                          |                    |                               |       |             |
| bHLHa23 | Tcf21                           | Tcf21    | Cor1(e)                       |                    |                               |       |             |
| bHLHa24 | Tcf23                           | Tcf23    | Out(e)                        |                    |                               |       |             |
| bHLHa25 | Unk2(e)                         | Unk2     |                               |                    |                               |       |             |
| bHLHa26 | Hand2                           | Hand2    | Hand2,<br>Dhand(e),<br>Hed(e) |                    |                               |       |             |
| bHLHa27 | Hand1                           | Hand1    | Hand1,<br>Hxt(e)              |                    |                               |       |             |
| bHLHa28 |                                 |          |                               | CG18144            |                               |       |             |

|         |                    |                   |                             |                       |         |      |                                         |
|---------|--------------------|-------------------|-----------------------------|-----------------------|---------|------|-----------------------------------------|
| bHLHa29 | Ptf1               | Ptf1a             | Ptf1a                       |                       |         |      |                                         |
| bHLHa30 |                    |                   |                             | CG33323               |         |      |                                         |
| bHLHa31 |                    | Fer3(e)           | Ferd3I                      |                       |         |      |                                         |
| bHLHa32 |                    |                   |                             | CG6913                |         |      |                                         |
| bHLHa33 |                    |                   |                             | CG5952                | F48D63  |      |                                         |
| bHLHa34 | Nhlh2              | Nesc(e)           | Nhlh2, Hen2                 |                       |         |      |                                         |
| bHLHa35 | Nhlh1              | Unk1(e)           | Nhlh1                       |                       |         |      |                                         |
| bHLHa36 |                    |                   |                             | CG3052                |         |      |                                         |
| bHLHa37 |                    |                   |                             |                       | C43H68  |      |                                         |
| bHLHa38 | Twist              | Twist1            | Twist1                      |                       |         |      |                                         |
| bHLHa39 | Twist2(e)          |                   | Twist2                      |                       |         |      |                                         |
| bHLHa40 | Tcf15              | Tcf15(e)          | Tcf15                       |                       |         |      |                                         |
| bHLHa41 | Sex                |                   | Sex                         |                       |         |      |                                         |
| bHLHa42 | Ascl3              | Putbhlh(e)        | Ascl3                       |                       |         |      |                                         |
| bHLHa43 |                    |                   |                             |                       | F57C123 |      |                                         |
| bHLHa44 | Ascl4              | Ascl4(e)          |                             |                       |         |      |                                         |
| bHLHa45 | Ascl2              | Ascl2             | Ascl2                       |                       |         |      |                                         |
| bHLHa46 | Ascl1              | Ascl1             | Ascl1                       |                       |         |      |                                         |
| bHLHb1  |                    |                   |                             |                       |         |      | Bhlh13,<br>Pif3-1, Put2,<br>Put1, Ptf-1 |
| bHLHb2  |                    |                   |                             |                       |         |      | Pif4-2, Pif4-<br>1, Unk2                |
| bHLHb3  |                    |                   |                             |                       |         |      | Bhlh12,<br>Bhlh11                       |
| bHLHb4  |                    |                   |                             |                       |         |      | Bhlh10,<br>Bhlh9                        |
| bHLHb5  |                    |                   |                             |                       |         |      | Bhlh8,<br>Bhlh7                         |
| bHLHb6  |                    |                   |                             |                       |         |      | Bhlh6,<br>Bhlh5                         |
| bHLHb7  |                    |                   |                             |                       |         |      | Exp2, Unk1                              |
| bHLHb8  |                    |                   |                             |                       |         |      | Bhlh4, F17                              |
| bHLHb9  |                    |                   |                             |                       |         |      | Erpr2                                   |
| bHLHb10 |                    |                   |                             |                       |         |      | Bhlh3, Erpr1                            |
| bHLHb11 | Usf1               | Usf1              | Usf1                        |                       |         |      |                                         |
| bHLHb12 | Usf2               | Usf2              |                             |                       |         |      |                                         |
| bHLHb13 |                    |                   |                             | CG17592A,<br>CG17592B |         |      |                                         |
| bHLHb14 |                    |                   |                             |                       | T01D32  |      | Bhlh2                                   |
| bHLHb15 |                    |                   |                             |                       |         | CBF1 |                                         |
| bHLHb16 |                    |                   |                             |                       |         | TYE7 |                                         |
| bHLHb17 |                    |                   |                             | CG2956                |         |      |                                         |
| bHLHb18 |                    |                   |                             |                       | T15H93  |      |                                         |
| bHLHb19 | Sef21a(e),<br>Tcf4 | Mitf2(e),<br>Tcf4 | Sef2(e),<br>Tcf4,<br>Me2(e) |                       |         |      |                                         |
| bHLHb20 | Tcf4c(e),          | Tcf12,            | Tcf12                       |                       |         |      |                                         |



|         |                                 |                                     |                          |                              |        |  |                          |
|---------|---------------------------------|-------------------------------------|--------------------------|------------------------------|--------|--|--------------------------|
|         | Tcf12                           | Reb3(e),<br>Rebox(e)                |                          |                              |        |  |                          |
| bHLHb21 | E47(e),<br>Kappa2bf(e),<br>Tcf3 | Pan1(e),<br>Tcfe2a(e),<br>Tcfe12(e) | Tcfin(e),<br>Tcfe2a, E2a |                              |        |  |                          |
| bHLHb22 |                                 |                                     |                          | CG5102                       |        |  |                          |
| bHLHb23 |                                 |                                     |                          | CG5545                       |        |  |                          |
| bHLHb24 | Id1a, Id1b                      | Id1                                 | Id1                      |                              |        |  |                          |
| bHLHb25 | Id3                             | Id3                                 | Id3                      |                              |        |  |                          |
| bHLHb26 | Id2                             | Id2                                 | Id2                      |                              |        |  |                          |
| bHLHb27 | Id4                             | Id4                                 | Id4                      |                              |        |  |                          |
| bHLHb28 |                                 |                                     |                          | CG1007                       |        |  |                          |
| bHLHb29 |                                 |                                     |                          |                              |        |  | Bhlh1                    |
| bHLHb30 |                                 |                                     |                          |                              |        |  | Exp1                     |
| bHLHb31 | Hey1                            |                                     | Hey1                     |                              |        |  |                          |
| bHLHb32 | Hey2                            |                                     | Hey2                     |                              |        |  |                          |
| bHLHb33 | Hey1                            |                                     | Hey1                     |                              |        |  |                          |
| bHLHb34 |                                 |                                     |                          | CG14548,<br>CG8333           |        |  |                          |
| bHLHb35 |                                 |                                     |                          | CG8361                       |        |  |                          |
| bHLHb36 |                                 |                                     |                          | CG6096,<br>CG8365            |        |  |                          |
| bHLHb37 | Hes7                            | Hes3                                | Hes3, Hes7               |                              |        |  |                          |
| bHLHb38 |                                 | Hes5                                | Hes5                     |                              |        |  |                          |
| bHLHb39 | Hes1, Hes4                      | Hes1                                | Hes1                     |                              |        |  |                          |
| bHLHb40 |                                 | Hes2                                | Hes2                     |                              |        |  |                          |
| bHLHc1  | Myf3(e),<br>Myod                | Myod1                               | Myod1                    |                              |        |  |                          |
| bHLHc2  | Myf5                            | Myf5(e)                             | Myf5                     |                              |        |  |                          |
| bHLHc3  | Myf4(e)                         | Myog                                | Myog                     |                              |        |  |                          |
| bHLHc4  | Myf6                            | Myf6                                | Myf6                     |                              |        |  |                          |
| bHLHc5  | Mpl                             | Mesp1                               | Mesp1                    |                              |        |  |                          |
| bHLHc6  |                                 | Mesp2(e)                            | Mesp2                    |                              |        |  |                          |
| bHLHc7  |                                 |                                     |                          | CG12952a,<br>CG12952b        |        |  | Bhlh46                   |
| bHLHc8  | GA                              |                                     | Fig1a                    |                              |        |  |                          |
| bHLHc9  |                                 |                                     |                          | CG7659                       |        |  |                          |
| bHLHc10 |                                 |                                     |                          | CG441                        |        |  |                          |
| bHLHc11 | Mxi1a,<br>Mxi1b                 | Mxi1                                | Mxi1, Mad                |                              |        |  |                          |
| bHLHc12 | Mad4                            |                                     | Mad4,<br>Mxd4            |                              |        |  |                          |
| bHLHc13 | Mxd3                            | Mxd3                                | Mxd3                     |                              |        |  |                          |
| bHLHc14 |                                 |                                     |                          | CG6494,<br>CG8328,<br>CG8346 |        |  |                          |
| bHLHc15 |                                 |                                     |                          |                              | R03E91 |  |                          |
| bHLHc16 |                                 |                                     |                          |                              |        |  | Bhlh45, Ptf-<br>3, Ptf-2 |

|         |      |  |       |                              |                 |               |                                        |
|---------|------|--|-------|------------------------------|-----------------|---------------|----------------------------------------|
| bHLHc17 |      |  |       |                              |                 |               | Pad, Bhlh44                            |
| bHLHc18 |      |  |       |                              |                 |               | F0                                     |
| bHLHc19 |      |  |       |                              |                 |               | Bhlh43<br>Bhlh42,<br>Bhlh41,<br>Bhlh40 |
| bHLHc20 |      |  |       |                              |                 |               | Bhlh39                                 |
| bHLHc21 |      |  |       | CG5927                       |                 |               |                                        |
| bHLHc22 |      |  |       |                              | T01E82          |               |                                        |
| bHLHc23 | Hes6 |  |       |                              |                 |               |                                        |
| bHLHc24 | Hes2 |  |       |                              |                 |               |                                        |
| bHLHc25 |      |  |       |                              | Y54G2A1         |               |                                        |
| bHLHc26 |      |  |       |                              |                 |               | Bhlh37,<br>Bhlh38,<br>Bhlh36           |
| bHLHc27 |      |  |       |                              |                 |               | Unk4                                   |
| bHLHc28 |      |  |       | CG3786,<br>CG3839,<br>CG3827 | C18A38          |               |                                        |
| bHLHc29 |      |  |       |                              |                 |               | Bhlh34,<br>Bhlh35                      |
| bHLHc30 |      |  |       |                              |                 |               | Bhlh33                                 |
| bHLHc31 |      |  |       |                              |                 |               | Bhlh32,<br>Bhlh31                      |
| bHLHc32 |      |  |       |                              |                 |               | Bhlh30,<br>Bhlh29                      |
| bHLHc33 |      |  |       |                              |                 |               | Bhlh28,<br>Bhlh27                      |
| bHLHc34 |      |  |       |                              | DY33,<br>F38C22 |               |                                        |
| bHLHc35 |      |  |       |                              |                 |               | Bhlh26,<br>Bhlh25                      |
| bHLHc36 |      |  |       |                              |                 |               | Exp7, Exp6                             |
| bHLHc37 |      |  |       |                              |                 | INO2,<br>PHO4 |                                        |
| bHLHc38 |      |  |       |                              |                 |               | Tif, Hyp1                              |
| bHLHc39 |      |  |       |                              |                 |               | Bhlh24                                 |
| bHLHc40 |      |  |       |                              |                 |               | Bhlh23                                 |
| bHLHc41 |      |  | Tfap4 |                              |                 |               |                                        |
| bHLHc42 |      |  |       | CG11450                      |                 |               |                                        |
| bHLHc43 |      |  |       |                              |                 |               | PP-1                                   |
| bHLHc44 |      |  |       |                              |                 |               | Bhlh22                                 |
| bHLHc45 |      |  |       |                              |                 | RTG1          |                                        |
| bHLHc46 |      |  |       |                              | F40G911         |               |                                        |
| bHLHc47 |      |  |       |                              |                 |               | Pif3-2                                 |
| bHLHc48 |      |  |       |                              | M05B55          |               |                                        |
| bHLHc49 |      |  |       |                              |                 |               | Unk3                                   |
| bHLHc50 |      |  |       |                              |                 |               | P50                                    |
| bHLHc51 |      |  |       |                              |                 |               | Exp5                                   |

|         |                     |                  |        |                                                              |         |  |                   |
|---------|---------------------|------------------|--------|--------------------------------------------------------------|---------|--|-------------------|
| bHLHc52 |                     |                  |        |                                                              |         |  | Exp4, Exp3        |
| bHLHc53 |                     |                  |        |                                                              |         |  | Bhlh20,<br>Bhlh21 |
| bHLHc54 |                     |                  |        |                                                              |         |  | Bhlh19,<br>Bhlh18 |
| bHLHc55 |                     |                  |        |                                                              |         |  | Bhlh17            |
| bHLHc56 |                     |                  |        |                                                              |         |  | Bhlh16,<br>Bhlh15 |
| bHLHc57 |                     |                  |        |                                                              |         |  | Bhlh14            |
| bHLHd1  | Srebf1a,<br>Srebf1b | Add1,<br>Srebp1c | Srebf1 |                                                              |         |  |                   |
| bHLHd2  | Srebf2              |                  | Srebf2 |                                                              |         |  |                   |
| bHLHd3  | Mnt                 |                  | Mnt    |                                                              |         |  |                   |
| bHLHd4  | Maxd                |                  |        |                                                              |         |  |                   |
| bHLHd5  | Maxf                |                  |        |                                                              |         |  |                   |
| bHLHd6  | Maxa, Max,<br>Maxb  |                  |        |                                                              |         |  |                   |
| bHLHd7  | Maxc                |                  |        |                                                              |         |  |                   |
| bHLHd8  | Maxe                |                  |        |                                                              |         |  |                   |
| bHLHd9  |                     |                  |        | CG9648                                                       |         |  |                   |
| bHLHd10 |                     |                  |        |                                                              | F46G106 |  |                   |
| bHLHd11 |                     |                  |        |                                                              | F38A63  |  |                   |
| bHLHd12 |                     |                  |        | CG18362a,<br>CG18362b,<br>CG18362c,<br>CG18362e,<br>CG18362d |         |  |                   |
| bHLHd13 | Wbscr14             |                  | Tefl4  | CG3350                                                       |         |  |                   |
| bHLHe1  | Arnt2               | Arnt2            | Arnt2  |                                                              |         |  |                   |
| bHLHe2  | Arnt                | Arnt             | Arnt   |                                                              |         |  |                   |
| bHLHe3  |                     |                  |        |                                                              | C25A111 |  |                   |
| bHLHe4  |                     |                  |        | CG11987                                                      |         |  |                   |
| bHLHe5  | Arntl               | Arntl            | Arntl  |                                                              |         |  |                   |
| bHLHe6  | Arntl2              |                  | Arntl2 |                                                              |         |  |                   |
| bHLHe7  |                     |                  |        | CG8727                                                       |         |  |                   |
| bHLHe8  | Clock               | Clock            | Clock  |                                                              |         |  |                   |
| bHLHe9  | Npas2               |                  | Npas2  |                                                              |         |  |                   |
| bHLHe10 |                     |                  |        | CG7391                                                       |         |  |                   |
| bHLHe11 | Npas1               |                  | Npas1  |                                                              |         |  |                   |
| bHLHe12 | Npas3               |                  | Npas3  |                                                              |         |  |                   |
| bHLHe13 |                     |                  |        | CG6883                                                       |         |  |                   |
| bHLHe14 | Sim1                |                  | Sim1   |                                                              |         |  |                   |
| bHLHe15 | Sim2                |                  | Sim2   |                                                              |         |  |                   |
| bHLHe16 |                     |                  |        | CG7771                                                       |         |  |                   |
| bHLHe17 | Hif3a, Epas1        | Hif3a            | Hif3a  |                                                              |         |  |                   |
| bHLHe18 |                     |                  |        |                                                              | 41G75   |  |                   |
| bHLHe19 | Bhlh1(e),<br>Olig2  | Olig2(e)         | Olig2  |                                                              |         |  |                   |

|         |                                        |          |         |                       |                   |  |                                         |
|---------|----------------------------------------|----------|---------|-----------------------|-------------------|--|-----------------------------------------|
| bHLHe20 | Olig3                                  | Olig3(e) | Olig3   |                       |                   |  |                                         |
| bHLHe21 | Olig1 var(e),<br>Olig1                 | Olig1    | Olig1   |                       |                   |  |                                         |
| bHLHe22 | Bhlhb5                                 | Beta2    | Bhlhb5  |                       |                   |  |                                         |
| bHLHe23 | Bhlhb4                                 |          | Bhlhb4  |                       |                   |  |                                         |
| bHLHe24 |                                        |          |         |                       |                   |  | Bhlh70,<br>Bhlh71                       |
| bHLHe25 |                                        |          |         |                       |                   |  | Bhlh69,<br>Bhlh68                       |
| bHLHe26 |                                        |          |         |                       |                   |  | Bhlh67,<br>Bhlh66                       |
| bHLHe27 |                                        |          |         |                       |                   |  | Myc                                     |
| bHLHe28 |                                        |          |         |                       |                   |  | Bhlh65                                  |
| bHLHe29 |                                        |          |         |                       |                   |  | Bhlh64, Btf                             |
| bHLHe30 |                                        |          |         |                       |                   |  | Bhlh63                                  |
| bHLHe31 |                                        |          |         |                       |                   |  | Bhlh60,<br>Bhlh62,<br>Bhlh61,<br>Bhlh59 |
| bHLHe32 | Mif                                    | Mitf     | Mitf    |                       |                   |  |                                         |
| bHLHe33 | Tcfe3                                  |          | Tcfe3   |                       |                   |  |                                         |
| bHLHe34 | Tfec                                   |          | Tfec    |                       |                   |  |                                         |
| bHLHe35 | Tfeb                                   |          | Tfeb    |                       |                   |  |                                         |
| bHLHe36 | Mondoa                                 |          | Wbscr14 |                       |                   |  |                                         |
| bHLHe37 | Mycn                                   | Mycs     | Nmyc1   |                       |                   |  |                                         |
| bHLHe38 | Mycl1                                  |          | Lmyc1   |                       |                   |  |                                         |
| bHLHe39 | Myc                                    | Myc      | Myc     |                       |                   |  |                                         |
| bHLHe40 | Bhlhb2                                 | Bhlhb2   | Bhlhb2  |                       |                   |  |                                         |
| bHLHe41 | Bhlhb3                                 | Bhlhb3   | Bhlhb3  |                       |                   |  |                                         |
| bHLHe42 | Ncoa11,<br>Ncoa13,<br>Ncoa12,<br>Ncoa3 | Ncoa1    |         |                       |                   |  |                                         |
| bHLHe43 |                                        |          |         | CG13316a,<br>CG13316b |                   |  |                                         |
| bHLHe44 |                                        |          |         | CG1194                |                   |  |                                         |
| bHLHe45 |                                        |          |         |                       |                   |  | Erfp                                    |
| bHLHe46 |                                        |          |         |                       | C17C31,<br>C17C37 |  |                                         |
| bHLHe47 |                                        |          |         |                       | F31A32,<br>F31A34 |  |                                         |
| bHLHe48 |                                        |          |         |                       |                   |  | Bhlh58,<br>T10024                       |
| bHLHe49 |                                        |          |         | CG17100               |                   |  |                                         |
| bHLHe50 |                                        |          |         | CG8704                |                   |  |                                         |
| bHLHe51 |                                        |          |         | CG10446               |                   |  |                                         |
| bHLHe52 |                                        |          |         |                       |                   |  | Exp9                                    |
| bHLHe53 |                                        |          |         |                       |                   |  | Bhlh57                                  |
| bHLHe54 |                                        |          |         |                       |                   |  | Cdp                                     |

|         |  |  |  |         |        |                                        |
|---------|--|--|--|---------|--------|----------------------------------------|
| bHLHe55 |  |  |  |         |        | Ptf-5                                  |
| bHLHe56 |  |  |  | CG7951  |        |                                        |
| bHLHe57 |  |  |  | CG10798 |        |                                        |
| bHLHe58 |  |  |  |         |        | Pif3-3                                 |
| bHLHe59 |  |  |  | CG1705  |        |                                        |
| bHLHe60 |  |  |  |         |        | Bhlh56                                 |
| bHLHe61 |  |  |  |         |        | Erpr4                                  |
| bHLHe62 |  |  |  |         |        | Erpr3                                  |
| bHLHe63 |  |  |  | CG7664  |        |                                        |
| bHLHe64 |  |  |  |         | Y7D3B7 |                                        |
| bHLHe65 |  |  |  |         |        | Rtg3                                   |
| bHLHe66 |  |  |  |         |        | Hms1                                   |
| bHLHe67 |  |  |  |         |        | Put3                                   |
| bHLHe68 |  |  |  |         |        | Bhlh55, Ptf-4, Bhlh54                  |
| bHLHe69 |  |  |  |         |        | Exp8                                   |
| bHLHe70 |  |  |  |         |        | Bhlh53, Bhlh52                         |
| bHLHe71 |  |  |  |         |        | Bhlh51, Bhlh50                         |
| bHLHe72 |  |  |  |         |        | Bhlh49, Bhlh48, Bhlh47                 |
| bHLHf1  |  |  |  |         |        | PP-2, Ptf-8                            |
| bHLHf2  |  |  |  |         |        | Bhlh86, Bhlh85                         |
| bHLHf3  |  |  |  |         |        | Ptf-7                                  |
| bHLHf4  |  |  |  |         |        | Bhlh84, Bhlh83                         |
| bHLHf5  |  |  |  |         |        | At,Bhlh82, Hyp3, Unk6, Ptf-6           |
| bHLHf6  |  |  |  |         |        | Bhlh81, Pbhlh2, Unk5, Spt              |
| bHLHf7  |  |  |  |         |        | Bhlh80, Hyp2, Hfr1, Pbhlh1             |
| bHLHf8  |  |  |  |         |        | Bhlh79, Bhlh78                         |
| bHLHf9  |  |  |  |         |        | Bhlh77                                 |
| bHLHf10 |  |  |  |         |        | Bhlh76, Bhlh75, Bhlh73, Bhlh72, Bhlh74 |

Multiple bHLH in a single box/cell are similar and closely related genes.

Supplemental Figure S1 (color)

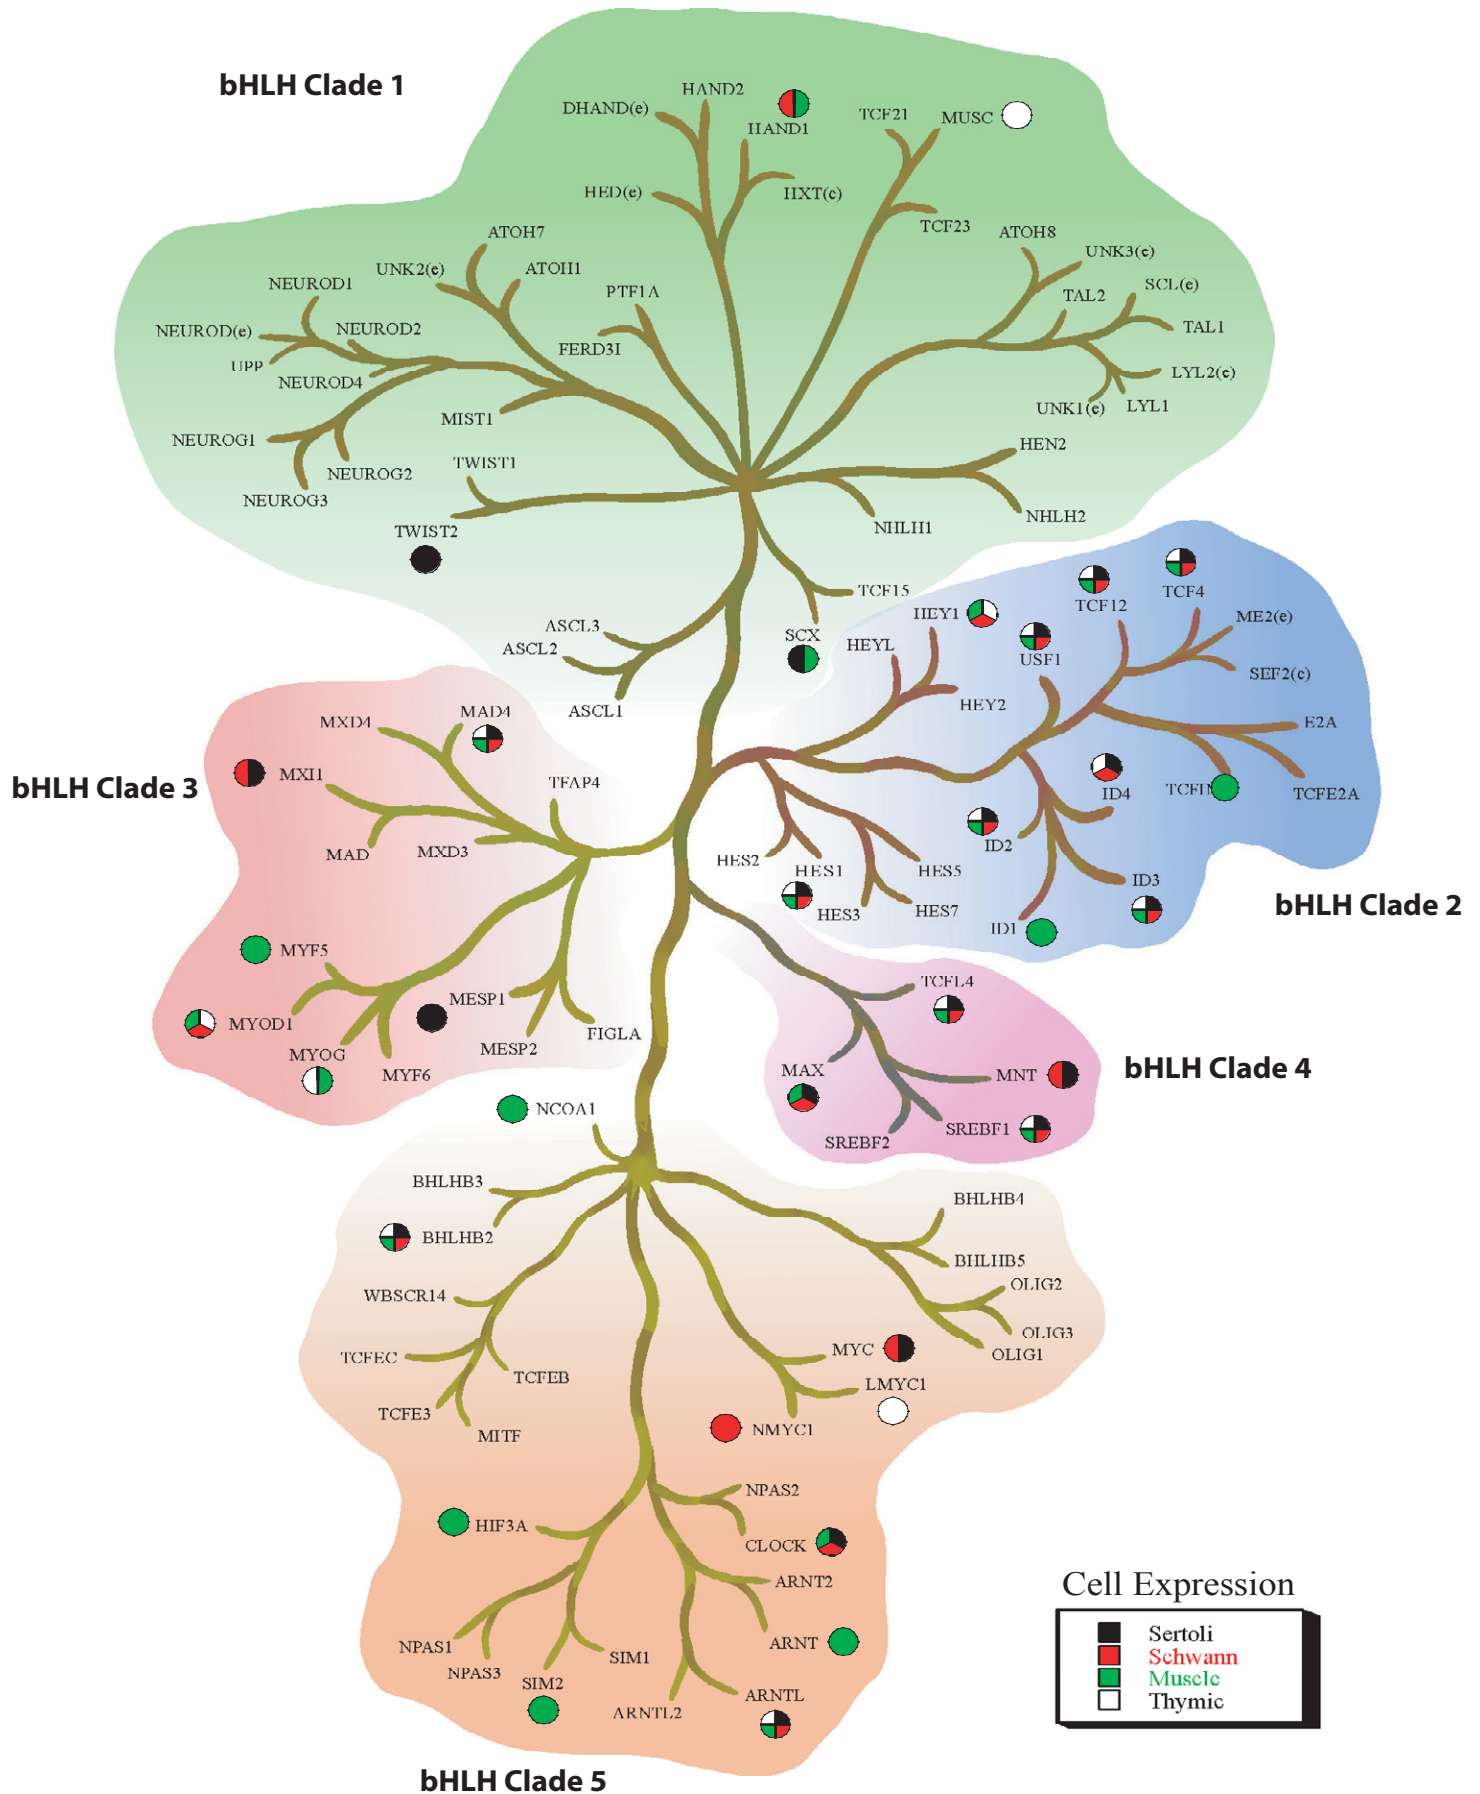

Supplemental Figure S1: Mouse bHLH super-tree for the 5 different clades and all 107 genes with the cellular expression of specific genes listed for Sertoli, Schwann, thymic and muscle cells. The expression is shown in the pie chart diagrams for each gene.
